# Supplementary material
Source: Springer Nature journal article supplement (http://www.springermedizin.de/resource/supplementary/13102_2012_8_MOESM3_ESM.pdf/9686396)

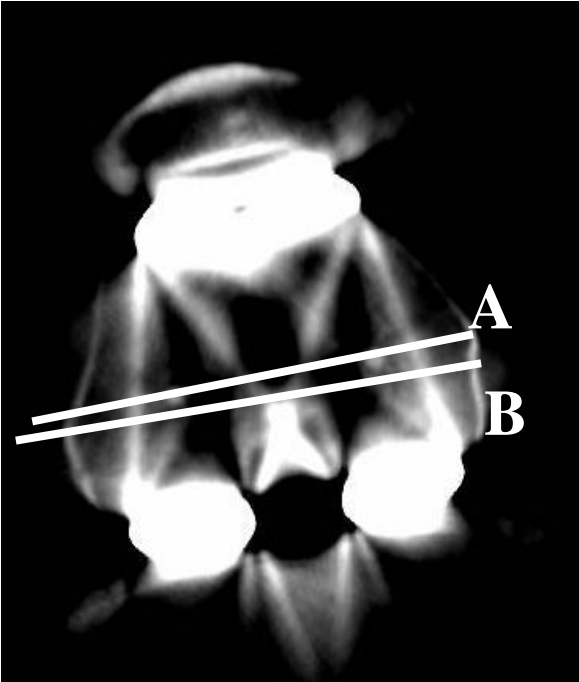

(a)

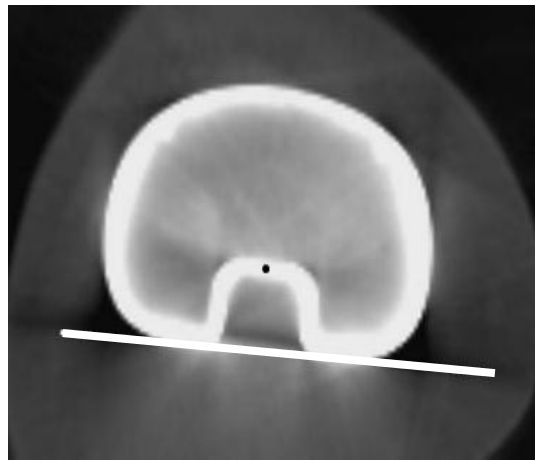

(b)

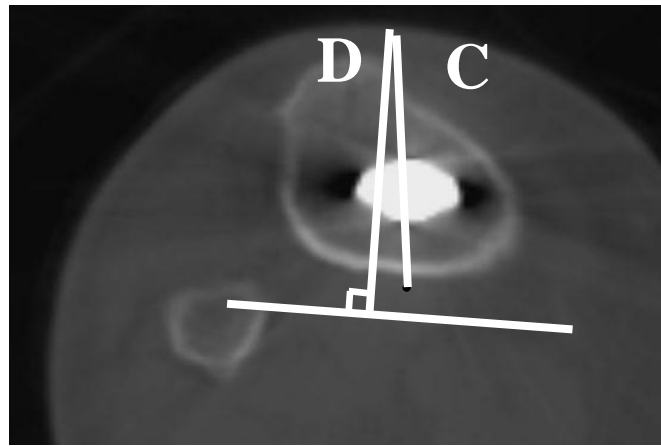

(c)

Supplement: MOESM3 [file 9686396]
